# Supplementary material for: Convex Grooves in Staggered Herringbone Mixer Improve Mixing Efficiency of Laminar Flow in Microchannel
Source: PubMed Central journal article supplement (PMC5096722; doi:10.1371/journal.pone.0166068), 2016-11-04
Supplement: pone.0166068.s003.pdf [file pone.0166068.s003.pdf]

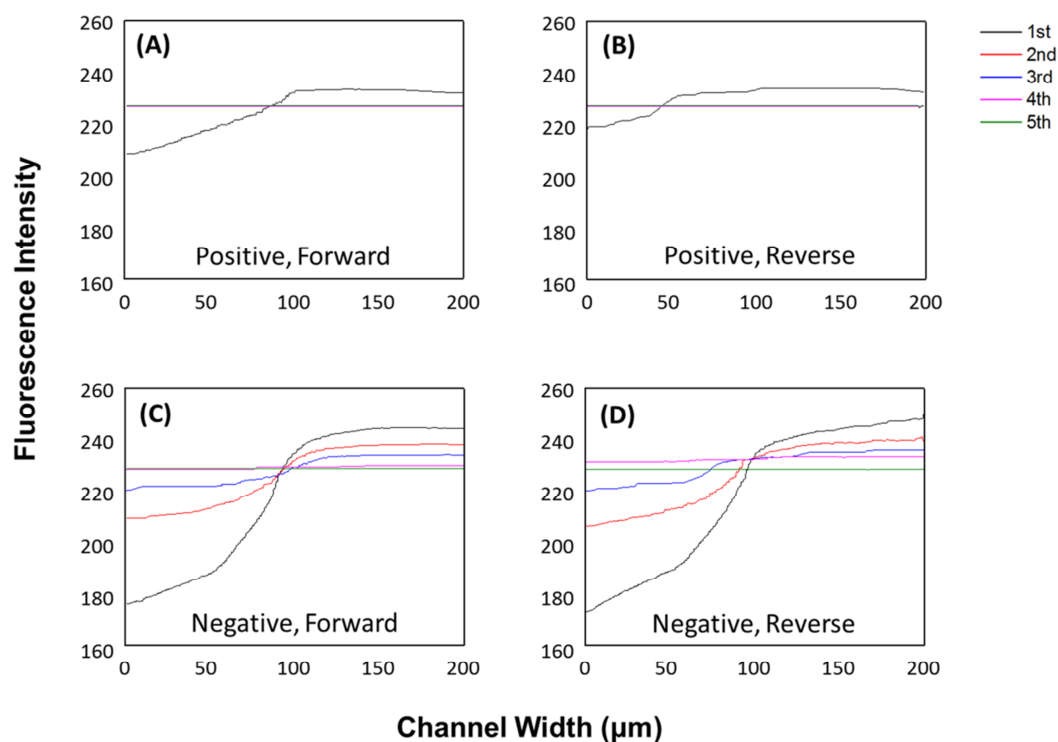

**S3 Fig. Simulated fluorescence intensity across the microchannel after each cycle. (A) Positive forward (B) Positive reverse (C) Negative forward (D) Negative reverse**

The concentrations of the fluorescence dye across the microchannels were analyzed after each cycle from 1 to 5 and displayed in S3 Fig. The numerically simulated image after each cycle was examined by cross-sectional images as fluorescence dye concentration. The maximum concentration is arbitrarily unit of fluorescence intensity set to maximum of 255 in all measured data.
