# Supplementary material for: Convex Grooves in Staggered Herringbone Mixer Improve Mixing Efficiency of Laminar Flow in Microchannel
Source: PubMed Central journal article supplement (PMC5096722; doi:10.1371/journal.pone.0166068), 2016-11-04
Supplement: pone.0166068.s004.pdf [file pone.0166068.s004.pdf]

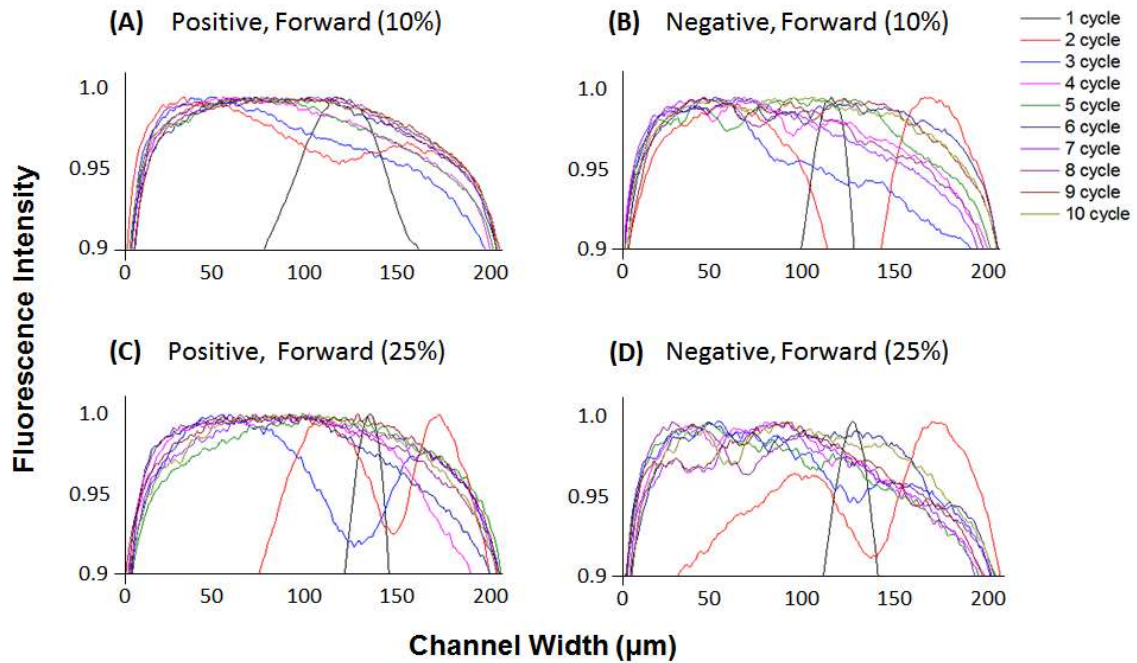

**S4 Fig. Normalized fluorescence intensity across the microchannel in viscous fluid test.** After each cycle from 1 to 10. (A) 10% Positive forward, (B) 10% Negative forward, (C) 25% Positive forward, (D) 25% Negative forward.

The mixing efficiency of the SHM devices was tested with viscous solutions. The concentrations of the fluorescence dye across the microchannels were analyzed after each cycle from 1 to 10 and displayed in S4 Fig.
